# Supplementary material for: The Different Phytochemical Profiles of Salvia officinalis Dietary Supplements Labelled for Menopause Symptoms
Source: MDPI journal article supplement (doi:10.3390/molecules29010094), 2023-12-22
Supplement: s1 [file s1]

Supplementary Materials

The Different Phytochemical Profiles of *Salvia officinalis* Dietary Supplements Labelled for Menopause Symptoms

Valentina Maggini 1,\*, Gianpaolo Bertazza 2, Eugenia Gallo 1, Vittorio Mascherini 1, Lorenzo Calvi 3, Chiara Marra 4, Francesca Michelucci 5, Chiara Liberati 6, Anna Trassi 7, Rita Baraldi 2 and Fabio Firenzuoli 1,\*

1 Research and Innovation Center in Phytotherapy and Integrated Medicine—CERFIT, Referring Center for Phytotherapy of Tuscany Region, Careggi University Hospital, 50134 Florence, Italy

2 Institute of Bioeconomy, National Research Council (IBE CNR), Via Gobetti 101, 40129 Bologna, Italy

3 Independent Researcher, Via Fratelli Cervi 14, 27100 Pavia, Italy

4 Casa Medica, Via Camozzi 77, 24121 Bergamo, Italy

5 DAI Anesthesia and Rianimation, University Hospital of Pisa, Via Roma 67, 56126 Pisa, Italy

6 Clinn srl, Piazza Vesuvio 19, 20144 Milan, Italy

7 General Practioner ASL Central Tuscany, Piazza IV Novembre 28, 51035 Pistoia, Italy

\* Correspondence: valentina.maggini@unifi.it (V.M.); fabio.firenzuoli@unifi.it (F.F.)

Table S1. Ratio (%) of the four eluent solutions used for HPLC runs in the isoflavones determination. During the elution, components of the mobile phase are varied with linear gradients.

| Minutes | Ratio of eluent solutions (%) |    |    |     |
|---------|-------------------------------|----|----|-----|
|         | A                             | B  | C  | D   |
| 0       | 80                            | 20 | 0  | 0   |
| 5       | 80                            | 20 | 0  | 0   |
| 29      | 72                            | 28 | 0  | 0   |
| 32      | 70                            | 28 | 2  | 0   |
| 56      | 54                            | 20 | 26 | 0   |
| 78      | 40                            | 6  | 54 | 0   |
| 87      | 34                            | 0  | 62 | 4   |
| 96      | 28                            | 0  | 62 | 10  |
| 141     | 0                             | 0  | 48 | 52  |
| 147     | 0                             | 0  | 20 | 80  |
| 150     | 0                             | 0  | 0  | 100 |

Table S2. Analytical standards used in this work (SigmaAldrich)

| Compound                                   | CAS number |
|--------------------------------------------|------------|
| Thujone standard mixture                   | 76231-76-0 |
| Internal standard thujone: Ethyl deconoate | 110-38-3   |
| daidzin                                    | 552-66-9   |
| genistin                                   | 529-59-9   |
| daidzein                                   | 552-66-9   |

| Compound  | CAS number |
|-----------|------------|
| genistein | 446-72-0   |

**Table S3.** Polyphenols and flavonoids (mg/100 g  $\pm$  SD) in *S. officinalis* extracts. Data are means from four separate experiments, each performed in triplicate. Differences were considered significant when  $p < 0.05$ . Products from SALVITILAB (T), ACEF (A), Fontana (F), Menosan (M).

| Mean value $\pm$ SD mg / 100 g | T                                | A                                | F                               | M                               | F test statistic (p value from one way ANOVA) |
|--------------------------------|----------------------------------|----------------------------------|---------------------------------|---------------------------------|-----------------------------------------------|
| <b>Total Polyphenols</b>       | <b>6986 <math>\pm</math> 318</b> | <b>3980 <math>\pm</math> 119</b> | <b>2203 <math>\pm</math> 98</b> | <b>3326 <math>\pm</math> 96</b> | <b>640.24 (&lt;0.0000)</b>                    |
| Flavonoids AlCl <sub>3</sub>   | 1274 $\pm$ 124                   | 780 $\pm$ 5                      | 316 $\pm$ 8                     | 929 $\pm$ 8                     | 160.48 (<0.0000)                              |
| Flavonoids DNPH                | 1257 $\pm$ 185                   | 725 $\pm$ 13                     | 598 $\pm$ 23                    | 555 $\pm$ 28                    | 54.47 (<0.0000)                               |
| <b>Total Flavonoids</b>        | <b>2532 <math>\pm</math> 66</b>  | <b>1505 <math>\pm</math> 12</b>  | <b>914 <math>\pm</math> 28</b>  | <b>1483 <math>\pm</math> 31</b> | <b>1531.35 (&lt;0.0000)</b>                   |

**Table S4.** Tukey-Kramer pairwise comparisons for polyphenols and flavonoids of *S. officinalis* extracts (post-hoc analyses for one-way ANOVA). Superscripts \* indicates statistically significant ( $p$  value  $< 0.05$ ) estimates. SALVITILAB (T), ACEF (A), Fontana (F), Menosan (M)

|                                          | T vs A   | T vs F   | T vs M   | A vs F   | A vs M | F vs M   |
|------------------------------------------|----------|----------|----------|----------|--------|----------|
| <b><i>Total Polyphenols</i></b>          |          |          |          |          |        |          |
| Mean difference                          | 3006     | 4783     | 3660     | 1777     | 654    | 1123     |
| TK-test                                  | 34.8134* | 55.3954* | 42.3876* | 17.8245  | 6.5594 | 11.261   |
| <b><i>Flavonoid AlCl<sub>3</sub></i></b> |          |          |          |          |        |          |
| Mean difference                          | 495      | 959      | 346      | 464      | 149    | 612      |
| TK-test                                  | 15.7177* | 30.4583* | 10.9963* | 12.7657* | 4.089  | 16.8546  |
| <b><i>Flavonoid DNPH</i></b>             |          |          |          |          |        |          |
| Mean difference                          | 532      | 659      | 702      | 127      | 170    | 43       |
| TK-test                                  | 11.1717* | 13.8517* | 14.7513* | 2.3210   | 3.1000 | 0.7791   |
| <b><i>Total Flavonoid</i></b>            |          |          |          |          |        |          |
| Mean difference                          | 1026     | 1618     | 1048     | 591      | 22     | 570      |
| TK-test                                  | 56.2039* | 88.5915* | 57.3974* | 28.0485* | 1.0336 | 27.0149* |

**Table S5.** Tukey-Kramer pairwise comparisons for  $\alpha$ -thujone and isoflavones of *Salvia officinalis* extracts (post-hoc analyses for one-way ANOVA). Superscripts \* indicates statistically significant (p value < 0.05) estimates. SALVITILAB (I), ACEF (A), Fontana (F), Menosan (M). LOQ, limit of quantification.

|                 | T vs A                          | T vs F  | T vs M  | A vs F   | A vs M   | F vs M  |
|-----------------|---------------------------------|---------|---------|----------|----------|---------|
|                 | <b><i>α-thujone</i></b>         |         |         |          |          |         |
| Mean difference | 0.0007                          | C < LOQ | 0.0007  | C < LOQ  | 0.0000   | C < LOQ |
| TK-test         | 7.5548*                         |         | 7.9804* |          | 0.3686   |         |
|                 | <b><i>Genestin</i></b>          |         |         |          |          |         |
| Mean difference | 0.1727                          | 0.0069  | D < LOQ | 0.1658   | D < LOQ  | D < LOQ |
| TK-test         | 20.6517*                        | 0.8205  |         | 17.1743* |          |         |
|                 | <b><i>Genestein</i></b>         |         |         |          |          |         |
| Mean difference | 0.1148                          | 0.0094  | 0.0052  | 0.1054   | 0.1200   | 0.0146  |
| TK-test         | 25.8646*                        | 2.1075  | 1.1743  | 20.5743* | 23.4164* | 2.8421  |
|                 | <b><i>Daidzin</i></b>           |         |         |          |          |         |
| Mean difference | 1.1243                          | 0.0984  | 0.0694  | 1.0259   | 1.1937   | 0.1678  |
| TK-test         | 48.5865*                        | 4.2503* | 2.9996  | 38.3963* | 44.649*  | 6.2786* |
|                 | <b><i>Total isoflavones</i></b> |         |         |          |          |         |
| Mean difference | 1.4117                          | 0.1146  | 0.0852  | 1.2971   | 1.4968   | 0.1997  |
| TK-test         | 52.3545*                        | 4.2487* | 3.1583  | 41.6609* | 48.0755* | 6.4146* |
